# Supplementary figures and images for: Whole-genome re-sequencing of two Italian tomato landraces reveals sequence variations in genes associated with stress tolerance, fruit quality and long shelf-life traits
Source: PubMed Central journal article supplement — DNA Res. 2017 Nov 14;25(2):149–60. doi: 10.1093/dnares/dsx045 (PMC5909465; doi:10.1093/dnares/dsx045), 2017-11-14

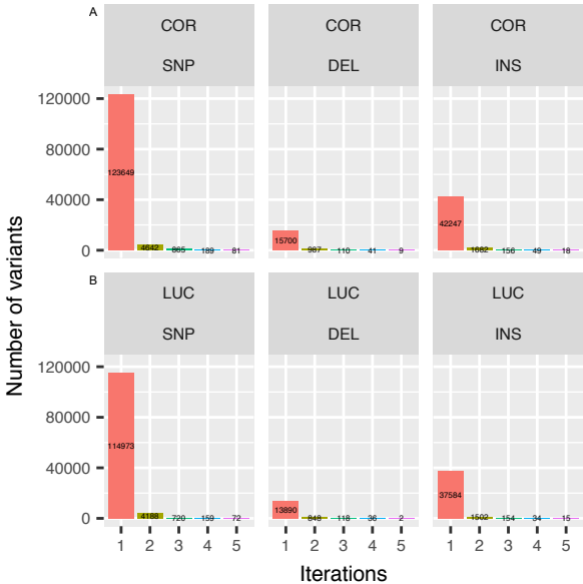

Supplement: dsx045_fig_s1.pdf [file dsx045_fig_s1.pdf]

## Chromosomal distribution of variants

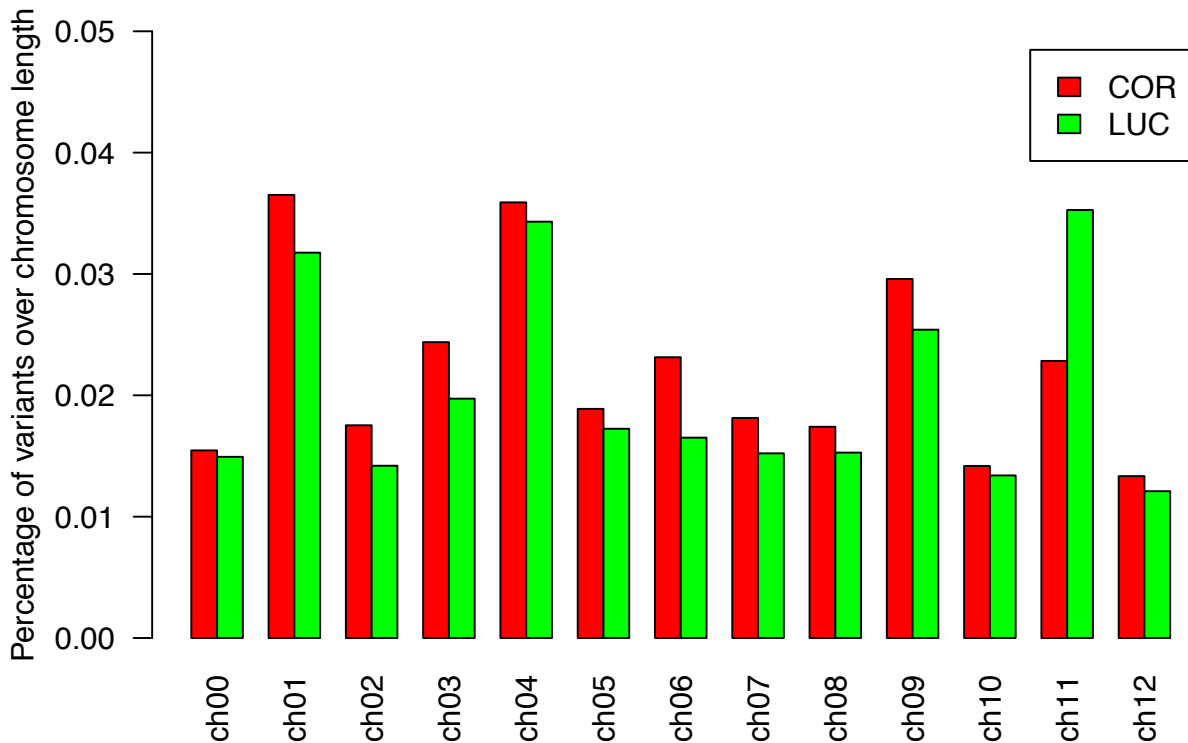

Supplement: dsx045_fig_s2.pdf [file dsx045_fig_s2.pdf]

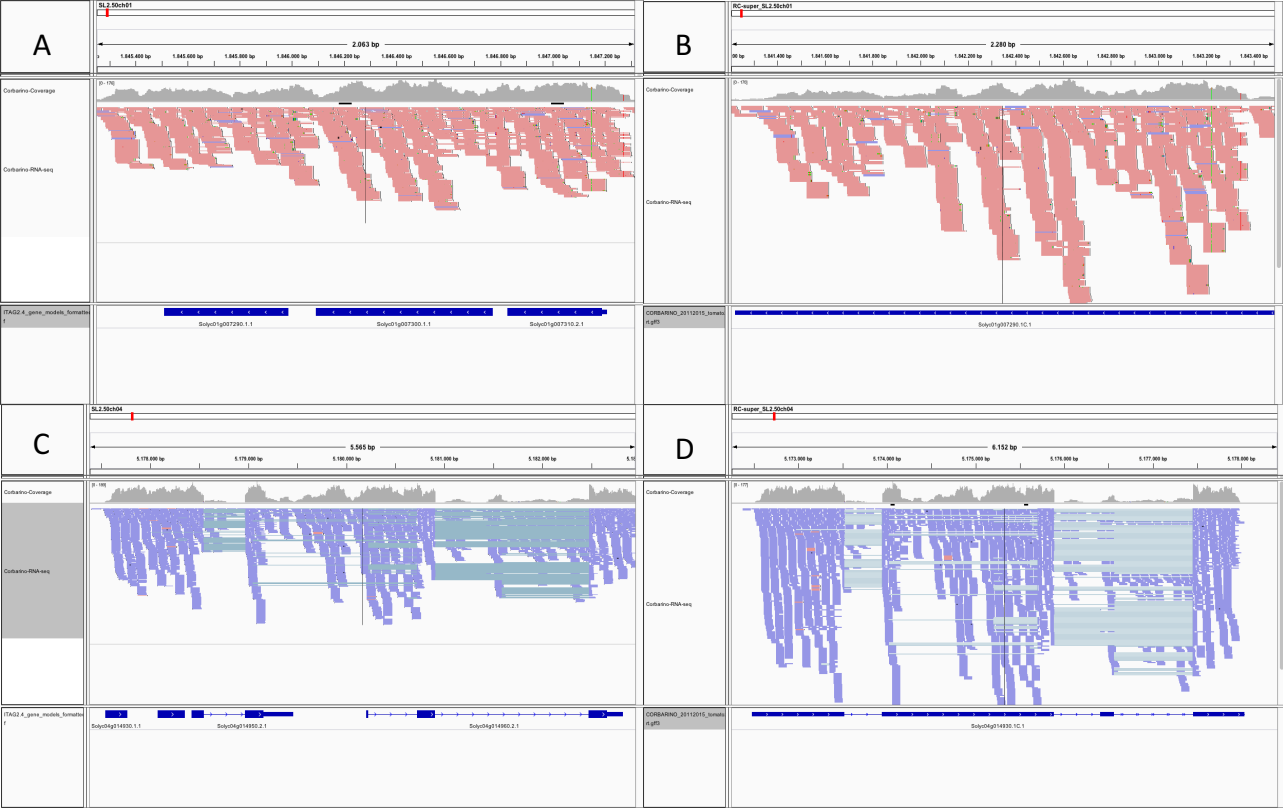

Supplement: dsx045_fig_s3.pdf [file dsx045_fig_s3.pdf]
